# Supplementary material for: Target of rapamycin, PvTOR, is a key regulator of arbuscule development during mycorrhizal symbiosis in Phaseolus
Source: PubMed Central journal article supplement (PMC8166948; doi:10.1038/s41598-021-90288-2), 2021-05-31
Supplement: 41598_2021_90288_MOESM1_ESM.pdf [file 41598_2021_90288_MOESM1_ESM.pdf]

# **Target of Rapamycin, *PvTOR*, Is a Key Regulator of Arbuscule Development during Mycorrhizal Symbiosis in *Phaseolus***

Manoj-Kumar Arthikala<sup>1#</sup>, Kalpana Nanjareddy<sup>1</sup>, Lourdes Blanco<sup>2</sup>, Xóchitl Alvarado-Affantranger<sup>3</sup>, Miguel Lara<sup>2</sup>

<sup>1</sup>Ciencias Agrogenómicas, Escuela Nacional de Estudios Superiores Unidad León-Universidad Nacional Autónoma de México (UNAM), León, C.P. 37684, Guanajuato, México.

<sup>2</sup>Departamento de Biología Molecular de Plantas, <sup>3</sup>Laboratorio Nacional de Microscopía Avanzada, Instituto de Biotecnología, UNAM, C.P. 62271 Cuernavaca, México.

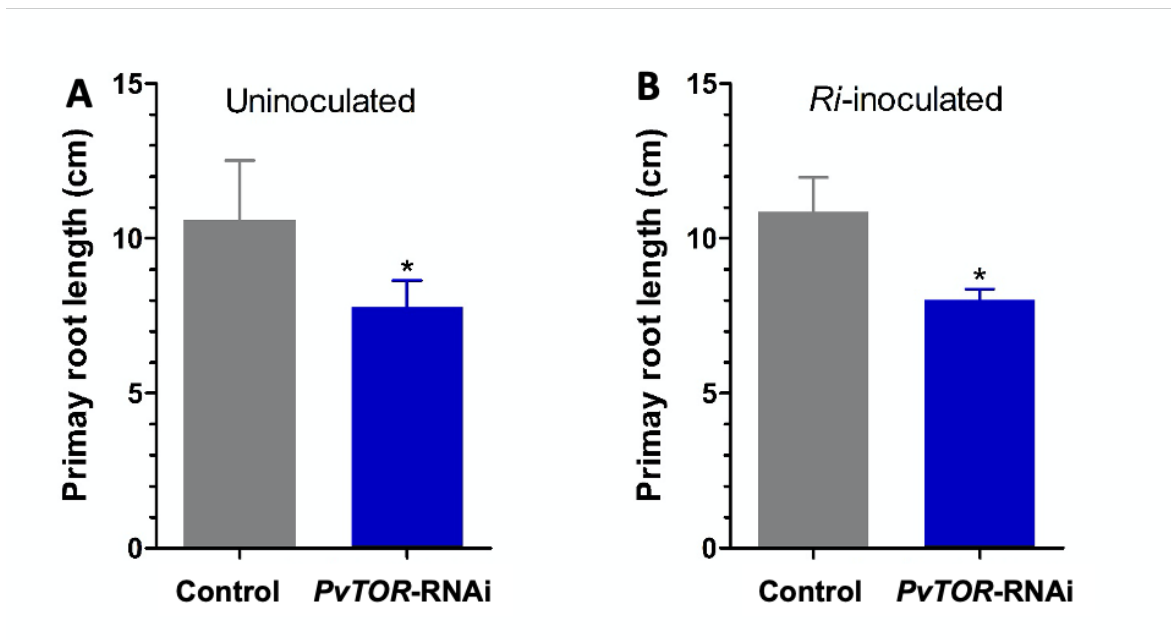

**Figure S1. Knockdown of *PvTOR* inhibits primary root length in *P. vulgaris*.** (A-B) Primary root length in uninoculated (A) and *Ri*-inoculated (B) transgenic roots of control and *PvTOR*-RNAi at 12 days post inoculation. The statistical significance of differences between control and *PvTOR*-RNAi roots was determined using an unpaired two-tailed Student's *t*-test (\*,  $P < 0.05$ ). Error bars refer to the SD of the mean of three biological replicates ( $n > 30$ ). *Ri*, *R. irregularis*.

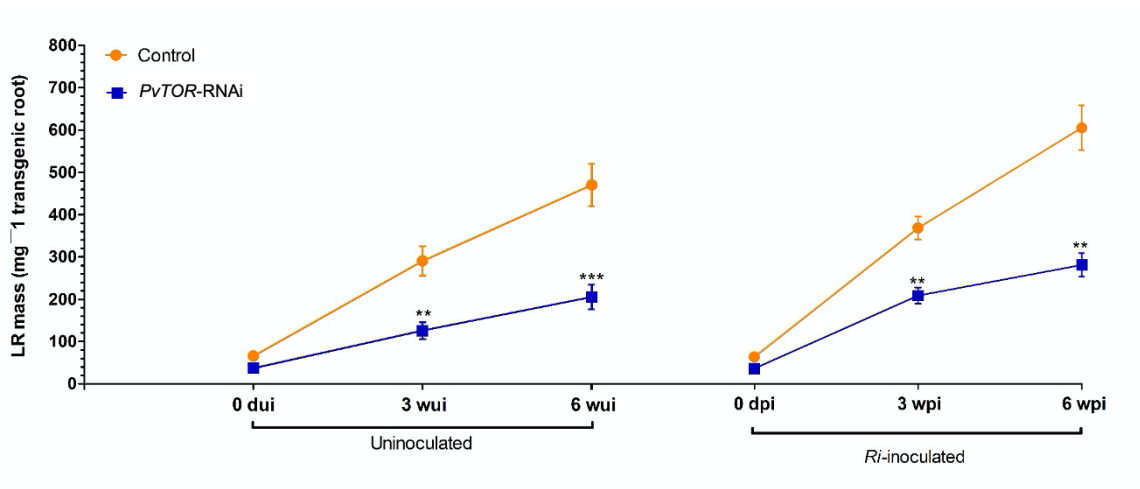

**Figure S2. Quantitative analysis of lateral root mass in uninoculated and *Ri*-inoculated transgenic roots of control and *PvTOR*-RNAi at different time points.** The statistical significance of differences between control and *PvTOR*-RNAi roots was determined using an unpaired two-tailed Student's *t*-test (\*\*,  $P < 0.01$ ; \*\*\*,  $P < 0.001$ ). Error bars refer to the SE of the mean of three biological replicates ( $n > 30$ ). LR, lateral root; *Ri*, *R. irregularis*; dui, day(s) uninoculated; dpi, day(s) post inoculation; wpi, week(s) post inoculation.

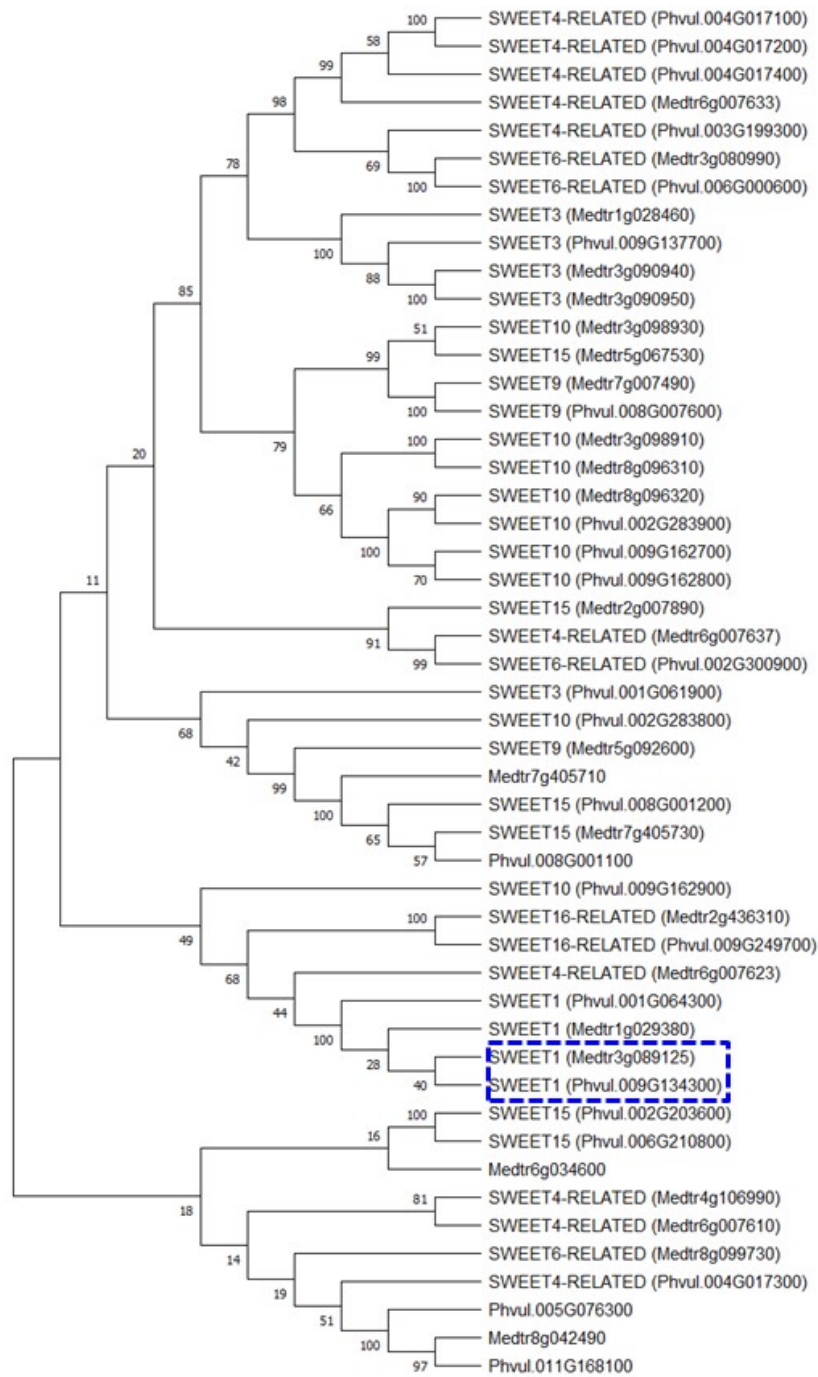

**Figure S3. Phylogenetic analysis of *Phaseolus vulgaris* and *Medicago truncatula* SWEET genes.** Protein sequences of SWEET homologs were identified in the Phytozome database. The phylogenetic tree was constructed using MEGA-X-10.1.1 software with the neighbor-joining (NJ) tree method with 1000 bootstrap values.

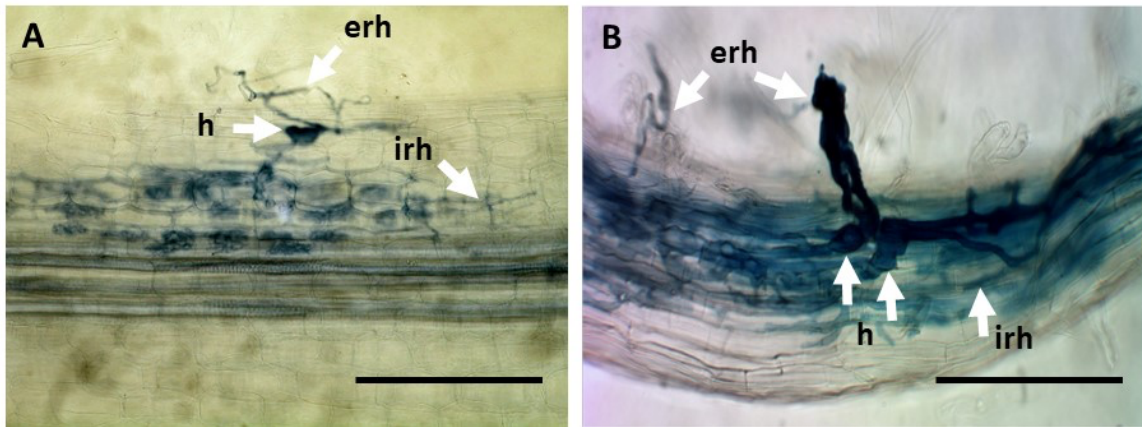

**Figure S4. Micrograph of *R. irregularis*-inoculated transgenic roots showing hyphopodia at 3wpi. (A) Control and (B) *PvTOR*-RNAi. wpi, week(s) post inoculation; erh, extraradical hyphae; irh, intraradical hyphae; h, hyphopodia. Bars = 1 mm.**

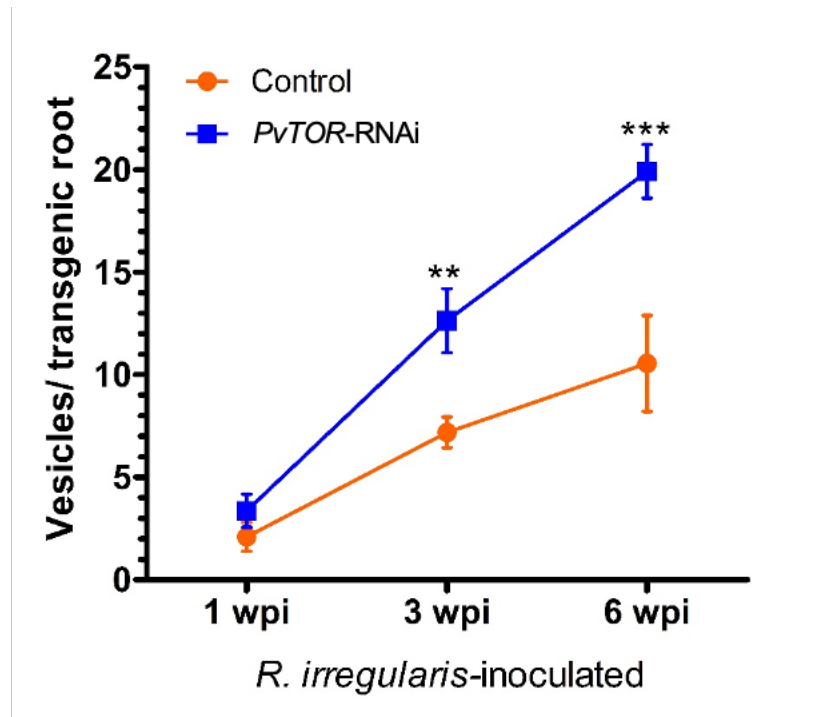

**Figure S5. Quantification of vesicles in mycorrhized *P. vulgaris* control and *PvTOR*-RNAi roots at 1, 3 and 6 wpi.** The statistical significance of differences between control and *PvTOR*-RNAi roots was determined using an unpaired two-tailed Student's *t*-test (\*\*,  $P < 0.01$ ; \*\*\*,  $P < 0.001$ ). Error bars refer to the SD of the mean of three biological replicates ( $n > 30$ ). wpi, week(s) post inoculation.

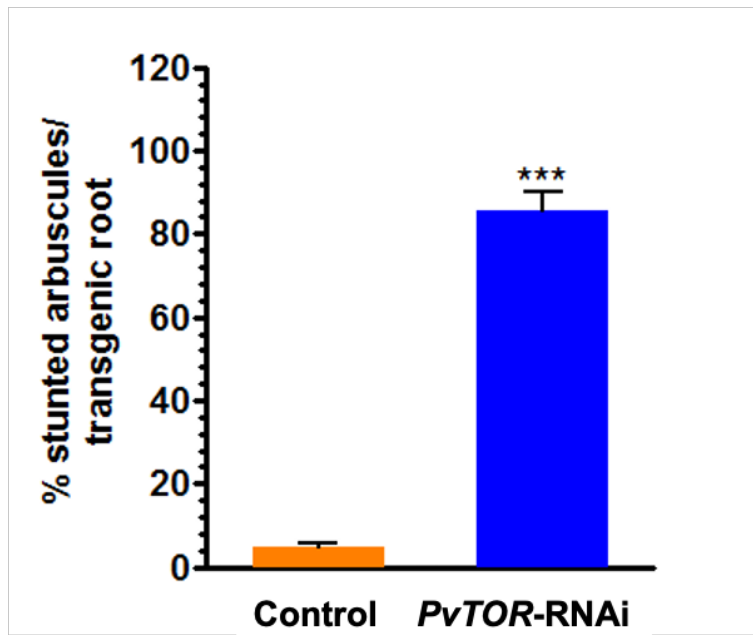

**Figure S6. Quantification of stunted arbuscules per transgenic root of control and *PvTOR*-RNAi at 6 wpi with *R. irregularis*.** The statistical significance of differences between control and *PvTOR*-RNAi roots was determined using an unpaired two-tailed Student's *t*-test (\*\*\*,  $P < 0.001$ ). Error bars refer to the SE of the mean of three biological replicates ( $n > 30$ ). wpi, weeks post inoculation.

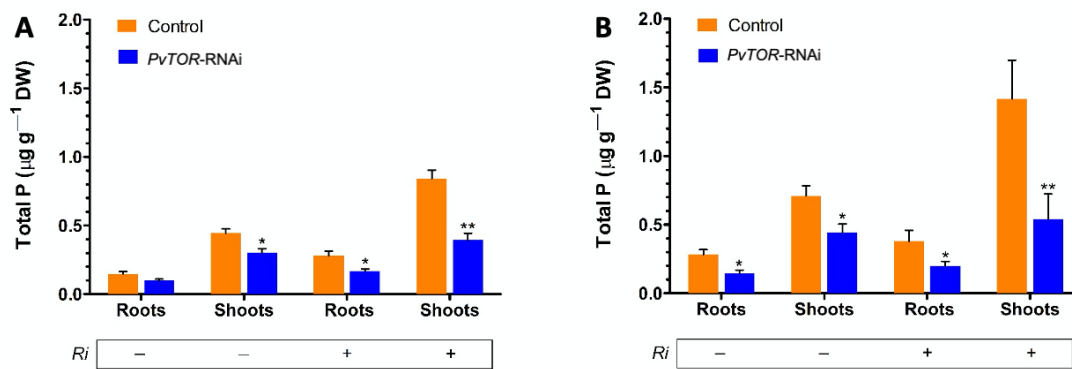

**Figure S7. Total root and shoot phosphorus (P) concentration in mycorrhized composite plants of control and *PvTOR*-RNAi at (A) 3 wpi and (B) 6 wpi.** The statistical significance of differences between control and *PvTOR*-RNAi samples was determined using an unpaired two-tailed Student's *t*-test (\*,  $P < 0.05$ ; \*\*,  $P < 0.01$ ). Error bars refer to the SD of the mean of three biological replicates ( $n > 12$ ). wpi, week(s) post inoculation, Ri, *R. irregularis*.



**Table S1:** Primer sequences of *Phaseolus vulgaris* genes used to generate constructs and perform quantitative RT-PCR.

| Gene                    |   | Oligonucleotide sequence (5' – 3') |
|-------------------------|---|------------------------------------|
| <i>EIF4a</i>            | F | GGTGTCCACACTGTTGTTGG               |
| <i>Phvul.010G136300</i> | R | CGGCATTGTAGCAGAGAACA               |
| <i>IDE</i>              | F | GCAACCAACCTTTCATCAGC               |
| <i>Phvul.001G133200</i> | R | AGAAATGCCTCAACCCTTTG               |
| <i>PvTOR-RNAi</i>       | F | CTTTCTGGTAATTCGCAAGGGAGCAGTA       |
| <i>Phvul.002G049900</i> | R | AGCTAATTGAGGCATGCCCTTTCATCTG       |
| <i>PvTOR</i>            | F | GCTAGCCGTTTGTATTTTGGTGAGC          |
| <i>Phvul.002G049900</i> | R | AGCAATTCCGTGTCGATAGGCCTCA          |
| <i>UPB1</i>             | F | CAAAGAAGGGTGTTAGGAGGCCAAG          |
| <i>Phvul.007G089100</i> | R | TGACACTCACTCTCGTTTGTAAAGG          |
| <i>RGF6</i>             | F | GCTACAGGAAAATCAACAGCAGCAAG         |
| <i>Phvul.002G062100</i> | R | CTGACCAGCTCCCAGCATTGACC            |
| <i>RGF9</i>             | F | AGGCCATGTCTTGTGCAAGTGCC            |
| <i>Phvul.002G267404</i> | R | TTGTTGTGCAGCTTCATGTTGTGGC          |
| <i>GSS</i>              | F | GCATTGTTGCCGACGCCGTTTC             |
| <i>Phvul.006G094700</i> | R | GACCGATGTAACCCCAATCGTATTTCCCTC     |
| <i>APK2</i>             | F | GAAGGTTTTCAAGGTCATAAAGAGTGTT       |
| <i>Phvul.002G089100</i> | R | CCAATAGCCACTTTCATCCTCACTGA         |
| <i>SIR</i>              | F | TTGCTGACCAGTTTGGGATCGG             |
| <i>Phvul.011G021800</i> | R | GATAATCCTTTCTCACGAGGGGAGC          |
| <i>APSI</i>             | F | TCTCCAAAACCTTCGACACC               |
| <i>Phvul.007G062900</i> | R | AACCCACTGCAAGTCGATTC               |
| <i>APR3</i>             | F | GGCCTGTTTTACCTGGACAA               |
| <i>Phvul.003G079800</i> | R | ATTTGCATGGGATTGGGATA               |
| <i>ORC5</i>             | F | CAACGGTGGACTGATGTCTG               |
| <i>Phvul.008G061800</i> | R | CTCCTTGCAACCTTCAAAGC               |
| <i>ETG1</i>             | F | TCGCGGAATGATACAAGACA               |
| <i>Phvul.009G142700</i> | R | CCGGGACACAGTAAAGCAGT               |
| <i>MCM7</i>             | F | GAAATGGCTAGGCACGTTGT               |
| <i>Phvul.001G212600</i> | R | GAATGTGGAGCATTGGACCT               |
| <i>CDC6</i>             | F | AAAATCTCCCCACAGCTCCT               |
| <i>Phvul.006G064300</i> | R | CTTGGCTCCACGAAAGTGAT               |
| <i>SUCS1</i>            | F | GGAAGCATGTGACCAACCTT               |
| <i>Phvul.009G223800</i> | R | GTGAAAGCTGCATGAGACCA               |
| <i>SUCS2</i>            | F | CAAGTGAACCGTGCTCGTAA               |
| <i>Phvul.009G250800</i> | R | AGGGCCACCATGACAAGTAG               |
| <i>CINV1</i>            | F | CTGGCTGTGATCCCAAAAAT               |
| <i>Phvul.007G091300</i> | R | GCCACCAGATAACCTGCAAT               |

|                         |   |                                |
|-------------------------|---|--------------------------------|
| <i>SWEET1</i>           | F | TGGAGTTCATGCCCTTCTTC           |
| <i>Phvul.009G134300</i> | R | TCCATGAATTCCTCCTCTGC           |
| <i>SWEET6</i>           | F | CGCTTCTCTCCATTCTCACC           |
| <i>Phvul.006G000600</i> | R | TGAAGGGATCAAAAGGGATG           |
| <i>SYMRK</i>            | F | GAAGATTTATGGTACTAGGT           |
| <i>Phvul.002G143400</i> | R | TGTCAAGGCTACTCTGGA             |
| <i>CCAMK</i>            | F | GTGCATCACCAAGGAAGAAGTAG        |
| <i>Phvul.011G186900</i> | R | TCACTGTTGGCATCCATTCTGTC        |
| <i>IPD3</i>             | F | GAAGAGGTGTGAAACCCTTGAGAA       |
| <i>Phvul.002G128600</i> | R | AATCTCTTCAAGCAGACGCTCCTT       |
| <i>NSP2</i>             | F | ACTATTCGGCGGTGTTTGAC           |
| <i>Phvul.009G122700</i> | R | TAGAAGCTTCGCTTGGCAAT           |
| <i>RAM1</i>             | F | GATATTGACCAAACCTACCCTAACCCACCA |
| <i>Phvul.001G089900</i> | R | CTAATTGGTCAGCAAAAAGGATTCCCAC   |
| <i>RAM2</i>             | F | GCTTTTTCCACCTTCCAACCGT         |
| <i>Phvul.007G233600</i> | R | AACCCACAGCTTCAAAGG             |
| <i>VPY</i>              | F | ATCAAAGAACCCTCCTCCATGTTC       |
| <i>Phvul.001G113900</i> | R | GAGCTTCTCTGATTTTCATCTATGGAG    |
| <i>VAMP713</i>          | F | GGACTCACCGTTCTCTGCAT           |
| <i>Phvul.008G201600</i> | R | ATTGATCCTGTGCGGCGTTAG          |
| <i>STR</i>              | F | GGCCTGTACCTGATGGAGAA           |
| <i>Phvul.002G331200</i> | R | CTTGGCTGCGTAGGCTAATC           |
| <i>STR2</i>             | F | TCGAGAAAGTGCACGACATC           |
| <i>Phvul.002G143300</i> | R | TTCTCTCCCTTGGGGACTTT           |
| <i>PT-4</i>             | F | GCGGTGACTAACATGTTAGGG          |
| <i>Phvul.004G007300</i> | R | CCTGTGCCCTAGTATTGTTGG          |
| <i>AM-1</i>             | F | GATGCAAGGTCAAAGGCCAC           |
| <i>Phvul.003G143400</i> | R | AACACCAACCCTTCCAACCT           |
| <i>HA-1</i>             | F | TGGTAAACCAAAGGACCGCA           |
| <i>Phvul.010G050900</i> | R | GCAGAGTGGAGGCCATGTAA           |
